# Supplementary material for: 5p and 3p Strands of miR-34 Family Members Have Differential Effects in Cell Proliferation, Migration, and Invasion in Cervical Cancer Cells
Source: PubMed Central journal article supplement (PMC6387060; doi:10.3390/ijms20030545), 2019-01-28
Supplement: ijms-20-00545-s001.pdf [file ijms-20-00545-s001.pdf]

| miRNA Expression and function                                           | miRNA analysis methodology              | Pathology and Human Tissue     | Cell line                                                                                                    | Human Tissue                                                                  | Cell process analyzed                                           | Targets and methodology used                                                                                                                                                  |
|-------------------------------------------------------------------------|-----------------------------------------|--------------------------------|--------------------------------------------------------------------------------------------------------------|-------------------------------------------------------------------------------|-----------------------------------------------------------------|-------------------------------------------------------------------------------------------------------------------------------------------------------------------------------|
| <b>miR-34a-5p (-)</b>                                                   | qRT-PCR                                 | Lung cancer, Colorectal cancer | H1299, NSCLC, BRC, CRC, and A549                                                                             | NA                                                                            | Migration Invasion                                              | Axl (Luciferase reporter assay, Western blotting, and RT-PCR)                                                                                                                 |
| <b>miR-34a-5p (-)</b><br><b>miR-34b-5p (-)</b><br><b>miR-34c-5p (-)</b> | qRT-PCR                                 | Gastric cancer                 | Kato III, AGS, N87, and MKN45                                                                                | NA                                                                            | Cell cycle Apoptosis Tumorsphere formation                      | BCL-2 (Luciferase reporter assay, qRT-PCR, and Western blot)<br>HMGA2, NOTCH1, NOTCH2, NOTCH3, NOTCH4 (qRT-PCR)                                                               |
| <b>miR-34a-5p (-)</b>                                                   | qRT-PCR                                 | Glioma                         | U251, A172, and SHG-44                                                                                       | NA                                                                            | Proliferation Cell cycle Apoptosis Migration Invasión           | SIRT1 (Luciferase reporter assay, Western blot, and qRT-PCR)                                                                                                                  |
| <b>miR-34a-5p (-)</b>                                                   | q RT-PCR                                | Hepatocellular carcinoma       | HepG2                                                                                                        | NA                                                                            | Proliferation Cell cycle Apoptosis Migration Invasion           | CDK4, CDC2, Cyclin D1, Cyclin A, HSP90B1, HSP27 (Western Blot)                                                                                                                |
| <b>miR-34a-5p (-)</b><br><b>miR-34b-5p (-)</b><br><b>miR-34c-5p (-)</b> | qRT-PCR                                 | Osteosarcoma                   | U2OS and SAOS-2                                                                                              | Primary tumor samples                                                         | Cell cycle Apoptosis                                            | CDK6 and Bcl-2 (Western Blott), E2F3 and Cyclin E2 (Luciferase reporter assay, Western Blot)                                                                                  |
| miR-34a-5p (-)<br>miR-34b-5p (-)<br>miR-34c-5p (-)                      | qRT-PCR<br><i>In situ</i> hybridization | Ovarian cancer                 | SKOV-3                                                                                                       | Stage tumors I, II, III, IV                                                   | Migration Invasion                                              | MET (qRT-PCR, Western Blotting, <i>In situ</i> hybridization)<br>CDK4 (Western blotting).                                                                                     |
| <b>miR-34a-5p (-)</b><br><b>miR-34b-5p (-)</b><br><b>miR-34c-5p (-)</b> | qRT-PCR                                 | Pancreatic Cancer              | MiaPaCa2 and BxPC3                                                                                           | NA                                                                            | Cell cycle Apoptosis Tumorsphere formation Tumor Growth in mice | BCL-2 (Luciferase reporter assay, qRT-PCR, Western blotting)<br>NOTCH1 and NOTCH2, (Western blot and qRT-PCR)<br>NOTCH3 and cMet (qRT-PCR)<br>Mcl-1 and Bcl-xL (Western blot) |
| <b>miR-34a-5p (-)</b>                                                   | qRT-PCR                                 | Prostate cancer                | PC3                                                                                                          | NA                                                                            | Cell cycle Chemoresistance                                      | SIRT1 (qRT-PCR, Western blotting, Luciferase reporter assay)<br>CDK6, E2F3, E2F1, Cyclin D1, BCL2 (Western blot)                                                              |
| miR-34a-5p (-)<br><b>miR-34b-5p (-)</b><br><b>miR-34c-5p (-)</b>        | qRT-PCR                                 | Lung cancer                    | SCLC cell lines [NCI-H1048 (H1048), SBC5, HCC33, NCIH211 (H211), NCI-H524 (H524), NCI-H841 (H841), NCI-H1688 | SCLC, NSCLC resected tumors, and malignant pleural effusions in SCLC patients | Anchorage independant growth, Migration Invasion                | c-MET and CDK6 (Western blot)                                                                                                                                                 |

|                                                                         |         |                    |                                                                                                                                                                                                                                                                                                                                                                                                                                  |                                                              |                                                         |                                                                                                                                                                                                                                                            |
|-------------------------------------------------------------------------|---------|--------------------|----------------------------------------------------------------------------------------------------------------------------------------------------------------------------------------------------------------------------------------------------------------------------------------------------------------------------------------------------------------------------------------------------------------------------------|--------------------------------------------------------------|---------------------------------------------------------|------------------------------------------------------------------------------------------------------------------------------------------------------------------------------------------------------------------------------------------------------------|
|                                                                         |         |                    | (H1688),<br>NCI-H1870<br>(H1870),<br>NCI-H2141<br>(H2141),<br>NCI-H82<br>(H82),<br>NCI-H249<br>(H249)] and<br>14 NSCLC<br>cell lines<br>[PC-9,<br>HCC827,<br>NCIH1975<br>(H1975),<br>NCI-H3255<br>(H3255),<br>A549, NCI-<br>H1395<br>(H1395),<br>NCI-H522<br>(H522),<br>NCI-H838<br>(H838),<br>HCC15,<br>NCI-H125<br>(H125),<br>NCI-H460<br>(H460),<br>NCI-H661<br>(H661),<br>NCI-H1299<br>(H1299),<br>and<br>NCIH358<br>(H358)] |                                                              |                                                         |                                                                                                                                                                                                                                                            |
| <b>miR-34a-5p (-)</b>                                                   | qRT-PCR | Lung<br>cancer     | A549,<br>BJ, NCI-<br>H460, Calu-<br>3, NCI-<br>H596, NCI-<br>H1650,<br>HCC2935,<br>SW-900,<br>NCI-H226,<br>NCIH522,<br>NCI-H1299,<br>Wi-38, and<br>TE353                                                                                                                                                                                                                                                                         | FFPE lung<br>tumor<br>samples,<br>NSCLC<br>tumor<br>samples. | Tumor growth<br>in mice and<br>Proliferation            | Ki-67, Caspase-3, c-<br>Met, Cdk4, Bcl-2<br>(immunohistochemis-<br>try)                                                                                                                                                                                    |
| <b>miR-34a-5p (-)</b><br><b>miR-34b-5p (-)</b><br><b>miR-34c-5p (-)</b> | qRT-PCR | Retinoblast<br>oma | Y79 and<br>Weri-Rb1                                                                                                                                                                                                                                                                                                                                                                                                              | NA                                                           | Cell viability<br>Cell cycle<br>Apoptosis               | <i>CCND1, CNNE2,</i><br><i>CDK4, E2F3, MDMX,</i><br><i>SIRT1, EMP1,</i><br><i>MLLT3, SLC30A3,</i><br><i>CTNND2, PLCG1,</i><br><i>ACTR1A, CDC25A,</i><br><i>ACTR1A, CDC25A,</i><br><i>EFNB1, KCNH2,</i><br><i>PPP1R10 (+), LYST</i><br><i>(+) (qRT-PCR)</i> |
| <b>miR-34a-5p (-)</b>                                                   | qRT-PCR | Colon<br>cancer    | HEK293T<br>and RKO                                                                                                                                                                                                                                                                                                                                                                                                               | Primary<br>human colon<br>cancer<br>tissues                  | Cell adhesion<br>Proliferation<br>Migration<br>Invasion | Fra-1 (Luciferase<br>reporter assay,<br>Western blot, qRT-<br>PCR)<br>MPP-1, MPP-9, and<br>c-MET (Western blot,<br>qRT-PCR)                                                                                                                                |

|                                                                         |                              |                                    |                                                          |              |                                                                                      |                                                                                                                                    |
|-------------------------------------------------------------------------|------------------------------|------------------------------------|----------------------------------------------------------|--------------|--------------------------------------------------------------------------------------|------------------------------------------------------------------------------------------------------------------------------------|
| <b>miR-34c-5p</b> (-)                                                   | qRT-PCR                      | Colon cancer                       | HCT-8                                                    | NA           | Proliferation<br>Anchorage independent growth,<br>Cell cycle                         | CDK4, cMyc (Western blot, and qRT-PCR)                                                                                             |
| <b>miR-34a-5p</b> (-)<br><b>miR-34b-5p</b> (-)<br><b>miR-34c-5p</b> (-) | qRT-PCR                      | Gastric cancer                     | SC-M1, AGS, AZ521, NUGC-3, KATO III, NCI-N87, and SNU-16 | NA           | Cell cycle<br>Tumorsphere formation<br>Migration<br>Invasion<br>Tumor Growth in mice | YY1 (Luciferase reporter assay, qRT-PCR, western blot), Plakoglobin (+, 34a, 34b, 34c) E-cadherin (34b, 34c), N-cadherin, Vimentin |
| <b>miR-34a-5p</b> (-)                                                   | qRT-PCR, microarray analysis | Glioma                             | NIH 3T3 and TS543                                        | NA           | Proliferation<br>Cell cycle<br>Apoptosis<br>Tumor Growth in mice                     | PDGFRA (Luciferase reporter assay, Western blot), NOTCH1 (Western blot)                                                            |
| <b>miR-34c-5p</b> (-)                                                   | qRT-PCR,                     | Leukemia                           | KG-1a, THP-1 and KASUMI-1                                | NA           | Senescence<br>Apoptosis<br>Cell cycle                                                | E2F3, CDK4, c-Met, c-Myc, cyclin E2, (Western blotting,)                                                                           |
| <b>miR-34a-5p</b> (-)                                                   | qRT-PCR,                     | Esophageal squamous cell carcinoma | HEK293, EC9706, and TE-1                                 | ESCC tissues | Migration<br>Invasion                                                                | MMP-2, MMP-9, FNDC3B (Luciferase reporter assay, Western blotting, and RT-PCR)                                                     |
| <b>miR-34a-5p</b> (-)                                                   | qRT-PCR,                     | Acute Myeloid Leukemia             | THP-1 and HS-5                                           | NA           | Apoptosis                                                                            | Bax (+), BCL2, Cyt C (+), Atg5. LC-3I, LC-3II (Western blotting), HMGB1 (Luciferase reporter assay, Western blotting, RT-PCR)      |

Table S1. Validated targets of miR-34 family members. miRNAs in bold were used to elucidated mRNA targets.
